# Supplementary material for: Novel Filamin C Myofibrillar Myopathy Variants Cause Different Pathomechanisms and Alterations in Protein Quality Systems
Source: MDPI journal article supplement (doi:10.3390/cells12091321), 2023-05-05
Supplement: s1 [file s1]

# Supplementary Materials:

**Table S1:** Antibody and reagent list

| Primary antibody    | species           | dilution              | manufacturer, ID / reference |
|---------------------|-------------------|-----------------------|------------------------------|
| Bag3                | rabbit polyclonal | IF 1:2000, WB 1:5000  | Abcam, ab47124               |
| CHIP                | rabbit polyclonal | 1:2000                | Calbiochem, PC711            |
| LC3B                | rabbit polyclonal | 1:200                 | Cell Signaling, #2775        |
| SQSTM1 / p62 [2C11] | mouse monoclonal  | IF 1:1000 , WB 1:1000 | Abcam, ab56416               |
| TRIM32              | rabbit polyclonal | IF 1:1000, WB 1:1000  | Novusbio, NBP1-33737         |
| Ubiquitin           | rabbit polyclonal | 1:50                  | Abcam, ab7780                |
| FYCO1               | rabbit polyclonal | 1:500                 | Sigma, HPA035526             |
| filamin [RR90]      | mouse monoclonal  | 1:40                  | [1]                          |
| XinA [XC4]          | mouse monoclonal  | 1:1                   | [2]                          |

| Secondary antibody / reagent | species         | conjugation     | manufacturer, ID                     |
|------------------------------|-----------------|-----------------|--------------------------------------|
| mouse IgG + IgM              | goat polyclonal | Alexa Fluor 594 | Jackson Immuno-Research, 115-585-068 |
| rabbit                       | goat polyclonal | Cy3             | Jackson Immuno-Research, 111-165-144 |
| mouse IgA                    | goat polyclonal | Alexa Fluor 488 | SouthernBiotech,1040-30              |
| mouse IgG1                   | goat polyclonal | Alexa Fluor 594 | Jackson Immuno-Research, 115-585-205 |
| DNA (nuclei)                 | DAPI            |                 | Thermo Scientific,62248              |

- van der Ven, P.F.M.; Obermann, W.M.J.; Lemke, B.; Gautel, M.; Weber, K.; Fürst, D.O. Characterization of Muscle Filamin Isoforms Suggests a Possible Role of  $\gamma$ -Filamin/ABP-L in Sarcomeric Z-Disc Formation. *Cell Motil.* **2000**, *45*, 149–162, doi:10.1002/(SICI)1097-0169(200002)45:2<149::AID-CM6>3.0.CO;2-G.
- van der Ven, P.F.M.; Ehler, E.; Vakeel, P.; Eulitz, S.; Schenk, J.A.; Milting, H.; Micheel, B.; Fürst, D.O. Unusual Splicing Events Result in Distinct Xin Isoforms That Associate Differentially with Filamin c and Mena/VASP. *Exp. Cell Res.* **2006**, *312*, 2154–2167, doi:10.1016/j.yexcr.2006.03.015.
